# Supplementary material for: From trash to resource: recovered-Pd from spent three-way catalysts as a precursor of an effective photo-catalyst for H2production
Source: Royal Society of Chemistry journal article supplement (doi:10.1039/c5gc02908b), 2016-01-01
Supplement: c5gc02908b1.pdf [file c5gc02908b1.pdf]

Electronic Supplementary Information for the paper

## From *trash* to *resource*: recovered-Pd from spent Three-Way Catalysts as precursor of an effective photo-catalyst for H<sub>2</sub> production

V. Gombac, T. Montini, A. Falqui, D. Loche, M. Prato, A. Genovese, M. L. Mercuri, A. Serpe,\* P. Fornasiero\* and P. Deplano.

### Characterization of catalysts

#### *Sample digestion and ICP-AES measurements*

Samples were digested by using a Milestone (Sorisole, Bergamo, Italy) Ethos 1 Microwave digester, equipped with a HPR1000/10S high pressure segmented rotor, ATC-400CE automatic temperature control and Terminal 640 with easyCONTROL software.

0.124 g of sample were introduced in a TFM (copolymer of PTFE, Polymer of TetraFluoroEthylene, with about 0.1% of PPVE, PerfluoroPropylene-VinylEther) vessel and treated with acid mixtures through a two-steps procedure as summarized in Table 2:

Table 2:

| Step | Acid mixture                                                                                                 | Microwave digesting conditions     |
|------|--------------------------------------------------------------------------------------------------------------|------------------------------------|
| 1    | H <sub>2</sub> SO <sub>4</sub> (98%, 2 mL), HNO <sub>3</sub> (65%, 2mL), H <sub>2</sub> O (bidistilled, 4mL) | t=10'; T=220°C; Power= up to 1000W |
| 2    | HF <sub>4</sub> (48%, 0.5 mL), HCl (37%, 0.5mL), H <sub>2</sub> O (bidistilled, 7mL)                         | t=20'; T=220°C; Power= up to 1000W |

Samples were prepared for analysis by filtering the small white solid residue and diluting the digested solutions with 1% HCl/HNO<sub>3</sub> blank. Then, the metals were determined using a ICP-AES Varian (Palo Alto, USA) Liberty 200 Spectrometer, with respect to 5 point calibration plots in the 0.5–10 ppm range.

#### *DR UV Visible Spectra*

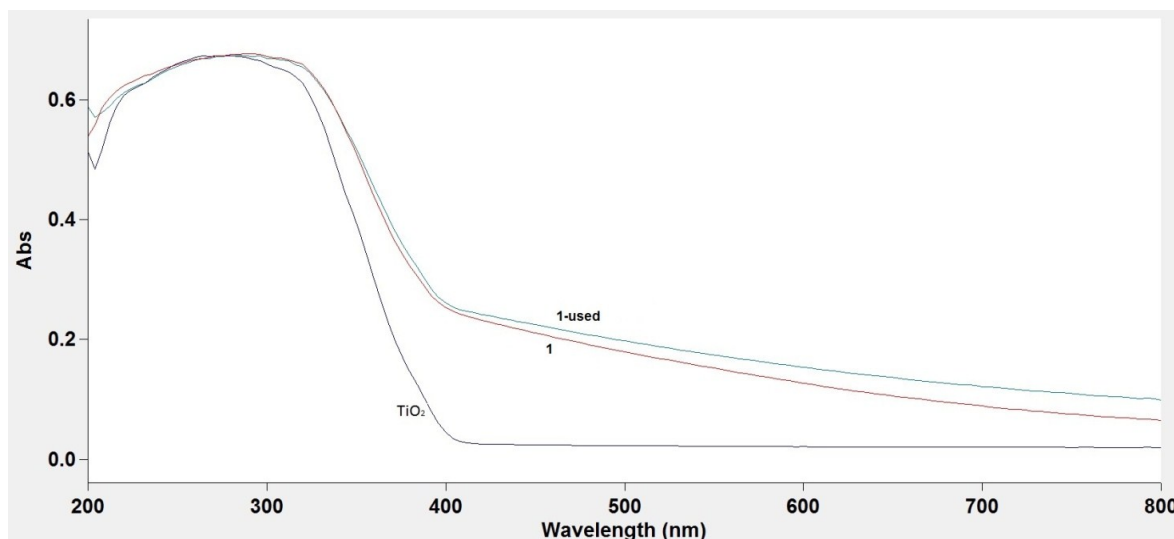

**Fig. S1** DR-spectra of samples **1** and **1-used** vs  $\text{TiO}_2$ .

**Photocatalytic activity**

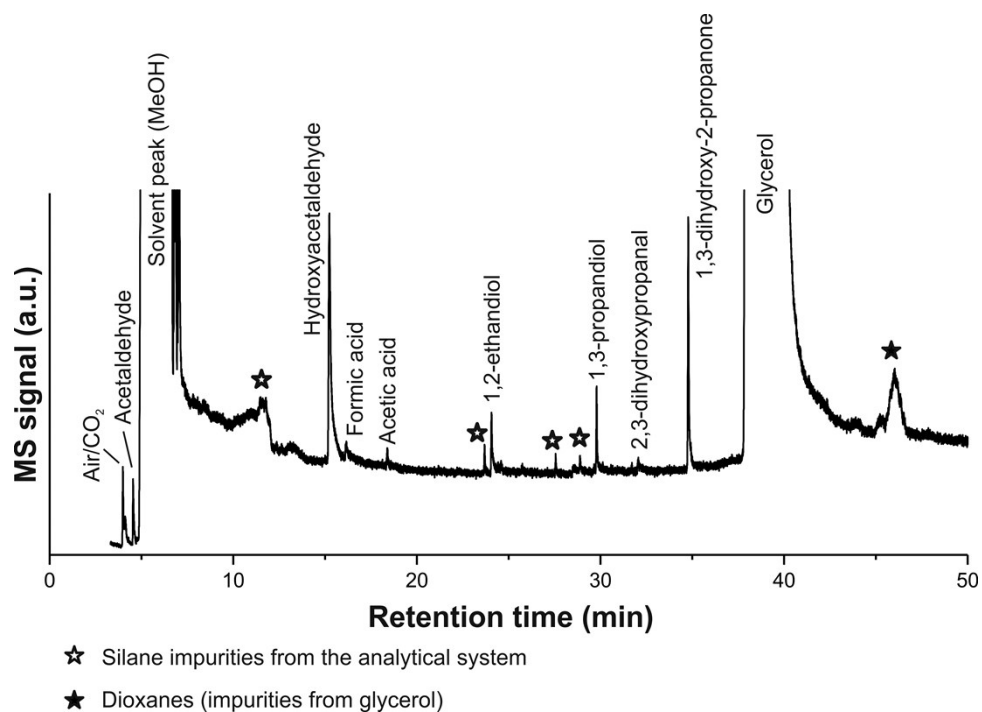

**Fig. S2** GC-MS analysis of liquid phase recovered from glycerol photo-reforming using sample **1**, at the end of experiment of Fig. 2 (diluted with methanol 1 to 10).

**XRD and TEM Characterization**

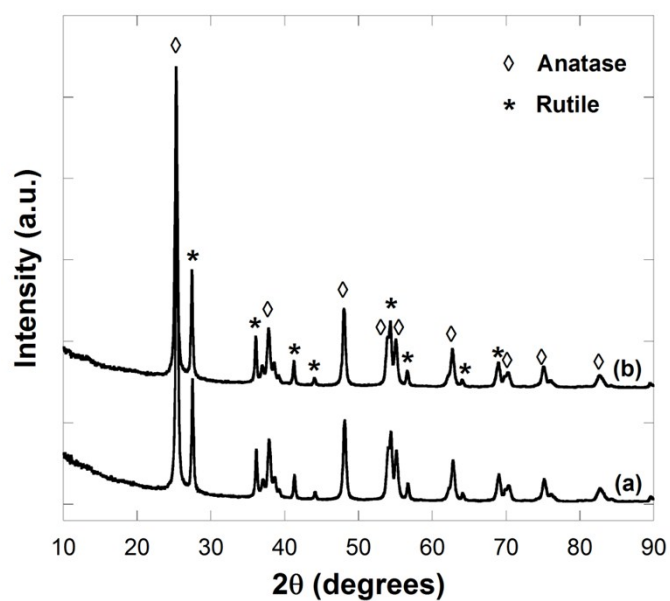

**Fig. S3** XRD patterns of (a) sample **1** and (b) sample **1-used** (Anatase PDF card 21-1272, Rutile PDF card 21-1276).

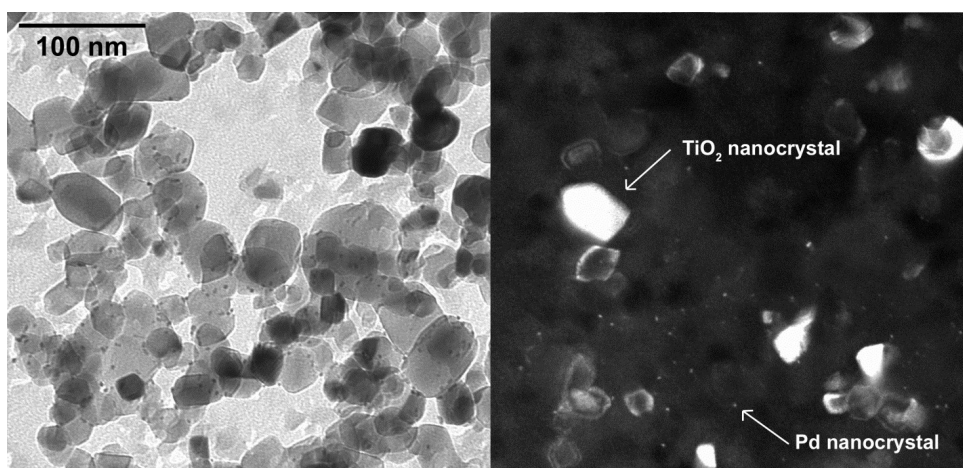

**Fig. S4** Bright Field (left) and Dark Field (right) TEM images of the sample **4**.

#### **XPS spectra**

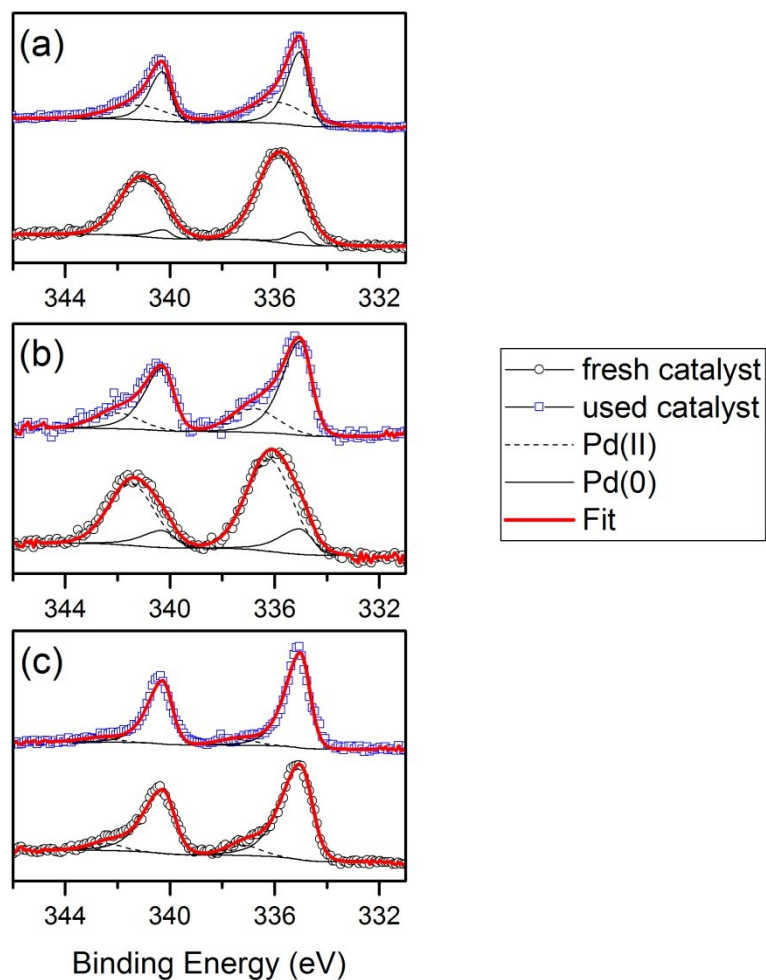

**Fig. S5** Pd 3d XPS spectra collected on fresh and used photo-catalysts. (a) catalyst **2**, prepared from  $[\text{Pd}(\text{Me}_2\text{dazdt})_2](\text{BF}_4)_2$ ; (b) catalyst **3**, prepared from  $\text{PdCl}_2$ ; (c) catalyst **4**, prepared from  $\text{Pd}(\text{NO}_3)_2$ . All the spectra have been deconvoluted to determine the Pd(0)/Pd(II) atomic ratio, as reported in Table 2 of the main text.
